# Supplementary material for: An atlas of brain-bone sympathetic neural circuits in mice
Source: eLife. 2024 Jul 4;13:e95727. doi: 10.7554/eLife.95727 (PMC11245306; doi:10.7554/eLife.95727)
Supplement: Figure 2—source data 1. [file elife-95727-fig2-data1.xlsx]

## Sheet: Brain regions
Number of PRV152+ neurons in the mouse brain 5 days after PRV152 injection into the right femur
	Number of PRV152+ neurons
Brain regions	Mouse 1	Mouse 2	Mouse 3	Mouse 4	Mean	SEM
Hypothalamus	1239	1317	1119	1034	1177.25	62.754
Midbrain & pons	1029	1034	1126	1071	1065	22.3868
Medula	569	465	418	529	495.25	33.4922
Forebrain	245	193	258	254	237.5	15.0803
Cerebral cortex	104	97	100	118	104.75	4.64354
Thalamus	62	62	87	50	65.25	7.78219

## Sheet: Hypothalamus
Number of PRV152+ neurons in the mouse hypothalamus 5 days after PRV152 injection into the right femur
	Number of PRV152+ neurons
Brain nuclei	Mouse 1	Mouse 2	Mouse 3	Mouse 4	Mean	SEM
LH	441	519	413	400	443.25	26.6595
PVH	180	200	203	217	200	7.62671
DM	133	148	96	96	118.25	13.2059
VMHC	70	78	66	50	66	5.88784
TC	70	45	78	48	60.25	8.12788
BLA	90	70	24	18	50.5	17.557
PH	44	43	46	46	44.75	0.75
CeM	8	51	48	11	29.5	11.5794
DMV	32	31	24	19	26.5	3.06866
AHP	16	27	21	25	22.25	2.42813
DMD	18	22	26	21	21.75	1.65202
Arc	28	29	11	18	21.5	4.29146
LA	17	3	8	19	11.75	3.77216
SCh	17	9	13	8	11.75	2.05649
ArcMP	18	5	16	5	11	3.48807
ArcLP	15	3	12	13	10.75	2.65754
ZI	22	19	0	2	10.75	5.67707
SChVL	12	9	7	11	9.75	1.10868
MPA	8	6	7	7	7	0.408248
	Number of PRV152+ neurons
PVH	Mouse 1	Mouse 2	Mouse 3	Mouse 4	Mean	SEM
PaMM	60	70	63	75	67	3.39116
PaLM	50	65	60	62	59.25	3.25
PaPo	31	27	36	36	32.5	2.17945
PaMP	15	17	16	18	16.5	0.645497
PaAP	15	9	22	13	14.75	2.71953
PaV	9	12	6	13	10	1.58114

## Sheet: Midbrain and pons
Number of PRV152+ neurons in the mouse midbrain and pons 5 days after PRV152 injection into the right femur
	Number of PRV152+ neurons
Brain nuclei	Mouse 1	Mouse 2	Mouse 3	Mouse 4	Mean	SEM
PAG	460	465	539	531	498.75	21.0174
PnO	138	158	178	150	156	8.40635
LC	106	119	144	162	132.75	12.5391
VTA	105	121	29	33	72	23.9096
DpMe	60	50	68	54	58	3.91578
LDTg	47	41	58	59	51.25	4.36606
CnF	45	42	41	34	40.5	2.32737
MPB	20	20	13	15	17	1.77951
Mo5	15	2	27	3	11.75	5.87899
DRI	12	6	5	12	8.75	1.88746
SubCV	5	2	17	11	8.75	3.32603
CGPn	10	4	6	4	6	1.41421
DMTg	3	4	0	1	2	0.912871
DRD	3	0	1	2	1.5	0.645497
	Number of PRV152+ neurons
PAG	Mouse 1	Mouse 2	Mouse 3	Mouse 4	Mean	SEM
LPAG	199	218	248	210	218.75	10.499
DMPAG	126	122	131	121	125	2.27303
VLPAG	74	66	102	98	85	8.85061
PAG	45	47	52	93	59.25	11.3459
DLPAG	16	12	6	9	10.75	2.136

## Sheet: Medulla
Number of PRV152+ neurons in the mouse medulla 5 days after PRV152 injection into the right femur
	Number of PRV152+ neurons
Brain nuclei	Mouse 1	Mouse 2	Mouse 3	Mouse 4	Mean	SEM
RPa	103	105	91	118	104.25	5.52834
RMg	105	82	91	101	94.75	5.17003
Gi	67	51	46	73	59.25	6.408
NTS	59	52	44	67	55.5	4.90748
GiA	51	40	39	38	42	3.02765
IRt	55	52	32	28	41.75	6.86021
GiV	36	37	26	35	33.5	2.53311
LPGi	20	19	17	27	20.75	2.17466
7N	23	10	8	13	13.5	3.32916
DPGi	19	5	13	10	11.75	2.92617
ROb	18	7	4	11	10	3.02765
MVePC	9	3	6	6	6	1.22474
Pr	4	2	1	2	2.25	0.629153
	Number of PRV152+ neurons
NTS	Mouse 1	Mouse 2	Mouse 3	Mouse 4	Mean	SEM
SolM	14	12	4	9	9.75	2.17466
SolIM	11	9	9	9	9.5	0.5
SolDL	5	8	12	11	9	1.58114
SolDM	4	8	3	12	6.75	2.05649
SolVL	8	5	8	6	6.75	0.75
SolV	5	3	1	10	4.75	1.93111
SolC	3	3	4	6	4	0.707107
SolG	4	2	1	1	2	0.707107
SolI	2	2	1	2	1.75	0.25
SolCe	3	0	1	1	1.25	0.629153

## Sheet: Forebrain
Number of PRV152+ neurons in the mouse forebrain 5 days after PRV152 injection into the right femur
	Number of PRV152+ neurons
Brain nuclei	Mouse 1	Mouse 2	Mouse 3	Mouse 4	Mean	SEM
MPOM	57	47	55	58	54.25	2.49583
BST	35	21	41	27	31	4.39697
LSV	27	22	29	25	25.75	1.49304
VP	15	12	34	32	23.25	5.67707
BSTMV	25	17	19	28	22.25	2.56174
VMPO	16	26	19	24	21.25	2.28674
LPO	28	15	18	21	20.5	2.78388
BSTMPL	5	4	17	11	9.25	3.0104
SFO	10	6	6	9	7.75	1.03078
AVPe	7	5	6	8	6.5	0.645497
MnPO	8	5	5	4	5.5	0.866025
MPOL	4	6	4	2	4	0.816497
BSTMA	2	5	2	0	2.25	1.03078
VOLT	3	1	3	2	2.25	0.478714
LSI	3	1	0	3	1.75	0.75

## Sheet: Cerebral cortex
Number of PRV152+ neurons in the mouse cerebral cortex 5 days after PRV152 injection into the right femur
	Number of PRV152+ neurons
Brain nuclei	Mouse 1	Mouse 2	Mouse 3	Mouse 4	Mean	SEM
S1HL	48	62	61	69	60	4.37798
M2	45	32	32	43	38	3.48807
M1	11	3	7	6	6.75	1.65202

## Sheet: Thalamus
Number of PRV152+ neurons in the mouse thalamus 5 days after PRV152 injection into the right femur
	Number of PRV152+ neurons
Brain nuclei	Mouse 1	Mouse 2	Mouse 3	Mouse 4	Mean	SEM
pv	35	26	39	20	30	4.30116
PrC	16	26	32	15	22.25	4.09013
LHbL	11	10	16	15	13	1.47196
